# Supplementary material
Source: PubMed Central journal article supplement (PMC8248273)
Supplement: NIHMS1602911-supplement-Supplement.pdf [file NIHMS1602911-supplement-Supplement.pdf]

# Web-based supporting materials for “Multi-armed Angle-based Direct learning for Estimating Optimal Individual Treatment Rules with Various Outcomes”

Zhengling Qi<sup>1</sup>, Dacheng Liu<sup>2</sup>, Haoda Fu<sup>3</sup>, and Yufeng Liu<sup>1\*</sup>

<sup>1</sup>Department of Statistics and Operations Research, Department of Genetics, Department of Biostatistics, Carolina Center for Genome Science, Lineberger Comprehensive Cancer Center, University of North Carolina, Chapel Hill

<sup>2</sup>Boehringer Ingelheim Pharmaceuticals, Inc., Ridgefield, CT, USA

<sup>3</sup>Eli Lilly and Company, Lilly Corporate Center, Indianapolis, IN, USA

\*E-mail: yfliu@email.unc.edu

August 22, 2018

## 1 Additional Simulation Studies

In this section, we include additional simulation results to further demonstrate the performance of our methods.

### 1.1 Continuous Outcome Studies

When the clinical outcome  $R$  is continuous, we report the simulation results with  $n = 400, 800, p = 20$  and  $n = 200, p = 20, 40$  for the three continuous simulation scenarios in the main paper.

Table 1: Results of average means (standard deviations) of empirical value functions and misclassification rates for four continuous-outcome simulations scenarios with 20 covariates. The best value functions and misclassification rates are in bold.

|            | $n = 400$          |                    | $n = 800$          |                    |
|------------|--------------------|--------------------|--------------------|--------------------|
|            | Value              | Misclassification  | Value              | Misclassification  |
| Scenario 1 |                    |                    |                    |                    |
| Pair-D     | 2.79(0.04)         | 0.45(0.02)         | 3.04(0.02)         | 0.29(0.02)         |
| $l_1$ -PLS | <b>3.12</b> (0.01) | <b>0.21</b> (0.01) | <b>3.16</b> (0.01) | <b>0.14</b> (0.01) |
| DL         | 2.67(0.03)         | 0.51(0.01)         | 2.78(0.02)         | 0.47(0.01)         |
| ACWL-1     | 2.77(0.03)         | 0.43(0.01)         | 2.91(0.02)         | 0.37(0.01)         |
| ACWL-2     | 2.91(0.02)         | 0.37(0.01)         | 3.04(0.01)         | 0.3(0.01)          |
| VT         | 2.75(0.02)         | 0.48(0.01)         | 2.85(0.01)         | 0.43(0.01)         |
| Group-AD   | 3.11(0.03)         | <b>0.21</b> (0.02) | 3.14(0.03)         | 0.16(0.02)         |
| Scenario 2 |                    |                    |                    |                    |
| Pair-D     | 2.82(0.11)         | 0.33(0.03)         | 2.92(0.1)          | 0.3(0.03)          |
| $l_1$ -PLS | 2.93(0.11)         | 0.36(0.04)         | 2.99(0.1)          | 0.32(0.03)         |
| DL         | 2.88(0.11)         | 0.34(0.04)         | 2.98(0.12)         | 0.28(0.04)         |
| ACWL-1     | 2.78(0.11)         | 0.38(0.02)         | 2.96(0.1)          | 0.31(0.02)         |
| ACWL-2     | 2.86(0.10)         | 0.37(0.02)         | 3.04(0.1)          | <b>0.28</b> (0.03) |
| VT         | <b>3.04</b> (0.09) | <b>0.30</b> (0.02) | <b>3.09</b> (0.1)  | 0.28(0.03)         |
| Group-AD   | 2.91(0.1)          | 0.32(0.03)         | 2.9(0.11)          | 0.31(0.03)         |
| Scenario 3 |                    |                    |                    |                    |
| Pair-D     | 1.2(0.04)          | 0.75(0.03)         | 1.21(0.04)         | 0.75(0.03)         |
| $l_1$ -PLS | 1.51(0.19)         | 0.54(0.15)         | 1.64(0.2)          | 0.41(0.18)         |
| DL         | 1.43(0.1)          | 0.61(0.06)         | 1.52(0.07)         | 0.55(0.06)         |
| ACWL-1     | 1.43(0.07)         | 0.61(0.05)         | 1.49(0.07)         | 0.56(0.05)         |
| ACWL-2     | 1.47(0.07)         | 0.58(0.05)         | 1.63(0.06)         | 0.45(0.05)         |
| VT         | 1.42(0.05)         | 0.62(0.03)         | 1.48(0.04)         | 0.57(0.03)         |
| Group-D    | <b>1.65</b> (0.11) | <b>0.43</b> (0.09) | <b>1.77</b> (0.04) | <b>0.29</b> (0.05) |

Table 2: Results of average means (std) of empirical value functions and misclassification rates for four continuous-outcome simulation scenarios with  $n = 200$ . The best value functions and misclassification rates are in bold.

|            | $p = 20$          |                   | $p = 40$          |                   |
|------------|-------------------|-------------------|-------------------|-------------------|
|            | Value             | Misclassification | Value             | Misclassification |
| Scenario 1 |                   |                   |                   |                   |
| Pair-D     | 2.54(0.06)        | 0.56(0.02)        | 2.36(0.05)        | 0.63(0.02)        |
| $l_1$ -PLS | 3.04(0.02)        | 0.29(0.01)        | 2.94(0.03)        | 0.36(0.02)        |
| DL         | 2.51(0.04)        | 0.58(0.02)        | 2.46(0.04)        | 0.6(0.01)         |
| ACWL-1     | 2.64(0.04)        | 0.5(0.02)         | 2.28(0.05)        | 0.65(0.02)        |
| ACWL-2     | 2.7(0.03)         | 0.48(0.01)        | 2.3(0.05)         | 0.64(0.02)        |
| VT         | 2.64(0.03)        | 0.53(0.01)        | 2.57(0.03)        | 0.55(0.01)        |
| Group-AD   | <b>3.05(0.03)</b> | <b>0.28(0.02)</b> | <b>3.02(0.03)</b> | <b>0.31(0.02)</b> |
| Scenario 2 |                   |                   |                   |                   |
| Pair-D     | 2.71(0.13)        | 0.37(0.04)        | 2.73(0.14)        | 0.36(0.05)        |
| $l_1$ -PLS | 2.81(0.12)        | 0.41(0.04)        | 2.83(0.12)        | 0.41(0.05)        |
| DL         | 2.72(0.12)        | 0.39(0.04)        | 2.71(0.13)        | 0.4(0.04)         |
| ACWL-1     | 2.57(0.12)        | 0.43(0.03)        | 2.05(0.13)        | 0.57(0.03)        |
| ACWL-2     | 2.63(0.12)        | 0.43(0.03)        | 2.1(0.13)         | 0.57(0.03)        |
| VT         | <b>2.97(0.1)</b>  | <b>0.33(0.02)</b> | <b>3.01(0.09)</b> | <b>0.33(0.02)</b> |
| Group-AD   | 2.86(0.11)        | 0.34(0.03)        | 2.9(0.11)         | 0.34(0.02)        |
| Scenario 3 |                   |                   |                   |                   |
| Pair-D     | 1.2(0.03)         | 0.75(0.03)        | 1.2(0.03)         | 0.75(0.03)        |
| $l_1$ -PLS | 1.37(0.15)        | 0.65(0.1)         | 1.31(0.11)        | 0.69(0.08)        |
| DL         | 1.34(0.09)        | 0.67(0.06)        | 1.29(0.09)        | 0.7(0.05)         |
| ACWL-1     | 1.27(0.08)        | 0.71(0.05)        | 1.2(0.04)         | 0.74(0.02)        |
| ACWL-2     | 1.27(0.08)        | 0.71(0.05)        | 1.2(0.05)         | 0.75(0.03)        |
| VT         | 1.35(0.07)        | 0.66(0.04)        | <b>1.33(0.06)</b> | <b>0.68(0.04)</b> |
| Group-D    | <b>1.38(0.16)</b> | <b>0.64(0.11)</b> | 1.31(0.13)        | <b>0.68(0.09)</b> |

## 1.2 Binary Outcome Studies

For the binary outcome  $R$ , we report the simulation results with  $n = 400, 800, p = 20$  and  $n = 200, p = 20, 40$  in addition to the results in the main paper.

Table 3: Results of average means (standard deviations) of empirical value functions and misclassification rates for two binary-outcome simulation scenarios with 20 covariates. The best value functions and misclassification rates are in bold.

|            | $n = 400$          |                    | $n = 800$          |                    |
|------------|--------------------|--------------------|--------------------|--------------------|
|            | Value              | Misclassification  | Value              | Misclassification  |
| Scenario 1 |                    |                    |                    |                    |
| $l_1$ -PLR | 0.89(0.01)         | 0.53(0.03)         | <b>0.92</b> (0)    | 0.4(0.02)          |
| DL         | 0.86(0.01)         | 0.64(0.02)         | 0.88(0.01)         | 0.58(0.02)         |
| VT         | 0.85(0.01)         | 0.66(0.02)         | 0.85(0)            | 0.67(0.02)         |
| Binary-AD  | <b>0.91</b> (0.01) | <b>0.41</b> (0.03) | <b>0.92</b> (0)    | <b>0.31</b> (0.03) |
| Scenario 2 |                    |                    |                    |                    |
| $l_1$ -PLR | 0.84(0.01)         | 0.63(0.02)         | <b>0.87</b> (0)    | 0.56(0.03)         |
| DL         | 0.82(0.01)         | 0.53(0.04)         | 0.85(0.01)         | 0.45(0.04)         |
| VT         | 0.84(0.01)         | 0.42(0.05)         | 0.83(0.01)         | 0.5(0.05)          |
| Binary-AD  | <b>0.86</b> (0.01) | <b>0.44</b> (0.03) | <b>0.87</b> (0.01) | <b>0.42</b> (0.02) |

Table 4: Results of average means (standard deviation) of empirical value functions and misclassification rates for two binary-outcome simulation scenarios with  $n = 200$ . The best value functions and misclassification rates are in bold.

|            | $p = 20$           |                    | $p = 40$           |                    |
|------------|--------------------|--------------------|--------------------|--------------------|
|            | Value              | Misclassification  | Value              | Misclassification  |
| Scenario 1 |                    |                    |                    |                    |
| $l_1$ -PLR | 0.86(0.01)         | 0.62(0.02)         | 0.85(0.01)         | 0.66(0.02)         |
| DL         | 0.85(0.01)         | 0.68(0.01)         | 0.84(0.01)         | 0.7(0.01)          |
| VT         | 0.84(0.01)         | 0.66(0.01)         | 0.83(0.01)         | 0.68(0.01)         |
| Binary-AD  | <b>0.88</b> (0.01) | <b>0.54</b> (0.02) | <b>0.87</b> (0.01) | <b>0.57</b> (0.02) |
| Scenario 2 |                    |                    |                    |                    |
| $l_1$ -PLR | 0.81(0.01)         | 0.68(0.05)         | 0.79(0.01)         | 0.7(0.05)          |
| DL         | 0.78(0.01)         | 0.59(0.01)         | 0.76(0.01)         | 0.61(0.01)         |
| VT         | <b>0.84</b> (0.01) | <b>0.38</b> (0.01) | <b>0.83</b> (0.01) | <b>0.36</b> (0.01) |
| Binary-AD  | 0.83(0.01)         | 0.49(0.04)         | 0.82(0.01)         | 0.52(0.04)         |

### 1.3 Survival Outcome Studies

For the survival outcome  $R$ , we report the simulation results with  $n = 400, 800, p = 20$  and  $n = 200, p = 20, 40$  in addition to the results in the main paper.

Table 5: Results of average means (standard deviations) of empirical value functions and misclassification rates for two survival-outcome simulation scenarios with 20 covariates. The best value functions and misclassification rates are in bold.

|            | $n = 400$           |                    | $n = 800$           |                    |
|------------|---------------------|--------------------|---------------------|--------------------|
|            | Value               | Misclassification  | Value               | Misclassification  |
| Scenario 1 |                     |                    |                     |                    |
| $l_1$ -CPH | 43.18(2.02)         | 0.26(0.04)         | 45.70(1.02)         | <b>0.17</b> (0.01) |
| Surv-AD    | <b>44.32</b> (1.27) | <b>0.23</b> (0.02) | <b>45.81</b> (1.06) | <b>0.17</b> (0.01) |
| Scenario 2 |                     |                    |                     |                    |
| $l_1$ -CPH | <b>22.48</b> (0.69) | 0.53(0.04)         | <b>23.52</b> (0.57) | 0.47(0.04)         |
| Surv-AD    | 22.28(0.61)         | <b>0.45</b> (0.02) | 22.77(0.49)         | <b>0.43</b> (0.02) |

Table 6: Results of average means (standard deviation) of empirical value functions and misclassification rates for two survival-outcome simulation scenarios with  $n = 200$ . The best value functions and misclassification rates are in bold.

|            | $p = 20$            |                    | $p = 40$            |                    |
|------------|---------------------|--------------------|---------------------|--------------------|
|            | Value               | Misclassification  | Value               | Misclassification  |
| Scenario 1 |                     |                    |                     |                    |
| $l_1$ -CPH | 36.27(3.25)         | 0.44(0.06)         | 32.19(3.47)         | 0.52(0.06)         |
| Surv-AD    | <b>40.41</b> (1.85) | <b>0.35</b> (0.03) | <b>39.46</b> (2.03) | <b>0.38</b> (0.03) |
| Scenario 2 |                     |                    |                     |                    |
| $l_1$ -CPH | 20.98(0.92)         | 0.6(0.03)          | 19.82(1.08)         | 0.63(0.03)         |
| Surv-AD    | <b>21.14</b> (0.95) | <b>0.49</b> (0.04) | <b>20.63</b> (0.95) | <b>0.51</b> (0.04) |

## 1.4 Low Rank Simulation Studies

When the clinical outcome  $R$  is continuous, we generate our data from the following model with

$$R_i = \mu(\mathbf{X}_i) + \sum_{k=1}^K (\mathbf{X}_i^T \beta_k) \mathbb{I}(A = k) + \epsilon_i,$$

where  $i = 1, \dots, n$ , each covariate is generated by the uniform distribution from  $-1$  to  $1$ , and  $\epsilon_i$  follows from the standard normal distribution. Let the coefficient matrix  $\Gamma = (\beta_1, \dots, \beta_k)$ . We consider the following two simulation scenarios:

1.  $\mu(\mathbf{X}) = 1 + X_1 + X_2$  and the coefficient matrix  $\Gamma = \mathbf{U}\mathbf{V}^T$ , where  $\mathbf{U} \in \mathbb{R}^{p \times 2}$  and  $\mathbf{V} \in \mathbb{R}^{p \times 2}$ . Each element of  $\mathbf{U}$  and  $\mathbf{V}$  is generated by the uniform distribution from  $-1$  to  $1$ ;
2.  $\mu(\mathbf{X}) = 1 + X_1^2 + X_2^2$  and the coefficient matrix  $\Gamma$  is the same as Scenario 1.

The difference in these two scenarios lies in the linear and nonlinear main effect functions. For each simulation scenario, we compare the following methods:

- (1)  $l_1$ -PLS proposed by Qian and Murphy (2011) with basis  $(1, \mathbf{X}, \mathbf{X}A)$ ;
- (2) Pairwise D-learning;
- (3) AD-learning with the group sparsity penalty;
- (4) AD-learning with the nuclear norm penalty.

All the tuning parameters are selected via 10-fold cross-validation. We report the value functions and misclassification errors for both  $p = 20$  and  $p = 40$  on 10000 independently generated test data in the following tables. We can see that our AD-learning has some advantages over  $l_1$ -PLS and pairwise D-learning.

Table 7: Results of average means (std) of empirical value functions and misclassification rates for four continuous-outcome simulation scenarios with 20 covariates. The best value functions and misclassification rates are in bold.

|             | $n = 800$         |                   | $n = 1600$        |                   |
|-------------|-------------------|-------------------|-------------------|-------------------|
|             | Value             | Misclassification | Value             | Misclassification |
| Scenario 1  |                   |                   |                   |                   |
| $l_1$ -PLS  | 1.64(0.41)        | 0.52(0.29)        | 1.7(0.38)         | 0.47(0.27)        |
| Pair-D      | 2(0.05)           | 0.32(0.06)        | 2.06(0.04)        | 0.25(0.05)        |
| Group-AD    | 1.97(0.06)        | 0.35(0.07)        | 2.05(0.04)        | 0.26(0.05)        |
| Low rank-AD | <b>2.05(0.04)</b> | <b>0.22(0.05)</b> | <b>2.09(0.04)</b> | <b>0.17(0.03)</b> |
| Scenario 2  |                   |                   |                   |                   |
| $l_1$ -PLS  | 2.37(0.36)        | 0.47(0.24)        | 2.52(0.35)        | 0.35(0.23)        |
| Pair-D      | 2.6(0.1)          | 0.38(0.1)         | 2.69(0.06)        | 0.29(0.08)        |
| Group-AD    | 2.6(0.07)         | 0.38(0.07)        | 2.68(0.05)        | 0.3(0.06)         |
| Low rank-AD | <b>2.7(0.06)</b>  | <b>0.24(0.06)</b> | <b>2.75(0.04)</b> | <b>0.19(0.03)</b> |

Table 8: Results of average means (std) of empirical value functions and misclassification rates for four continuous-outcome simulation scenarios with 40 covariates. The best value functions and misclassification rates are in bold.

|             | $n = 800$         |                   | $n = 1600$        |                   |
|-------------|-------------------|-------------------|-------------------|-------------------|
|             | Value             | Misclassification | Value             | Misclassification |
| Scenario 1  |                   |                   |                   |                   |
| $l_1$ -PLS  | 1.64(0.41)        | 0.52(0.29)        | 1.7(0.38)         | 0.47(0.27)        |
| Pair-D      | 2(0.05)           | 0.32(0.06)        | 2.06(0.04)        | 0.25(0.05)        |
| Group-AD    | 1.97(0.06)        | 0.35(0.07)        | 2.05(0.04)        | 0.26(0.05)        |
| Low rank-AD | <b>2.05(0.04)</b> | <b>0.22(0.05)</b> | <b>2.09(0.04)</b> | <b>0.17(0.03)</b> |
| Scenario 2  |                   |                   |                   |                   |
| $l_1$ -PLS  | 2.37(0.36)        | 0.47(0.24)        | 2.52(0.35)        | 0.35(0.23)        |
| Pair-D      | 2.6(0.1)          | 0.38(0.1)         | 2.69(0.06)        | 0.29(0.08)        |
| Group-AD    | 2.6(0.07)         | 0.38(0.07)        | 2.68(0.05)        | 0.3(0.06)         |
| Low rank-AD | <b>2.7(0.06)</b>  | <b>0.24(0.06)</b> | <b>2.75(0.04)</b> | <b>0.19(0.03)</b> |

### 1.5 Further Comparison with $l_1$ -PLS

In this section, we compare our proposed AD-learning with  $l_1$ -PLS when the main effect functions  $\mu(\mathbf{X}) = 1 + X_1^2 + X_2^2$  in the first scenario of continuous outcome settings with the non-zero coefficients are generated by uniform distribution from  $-1$  to  $1$ . Table 9 demonstrates the advantage of our proposed method over  $l_1$ -PLS by avoiding modeling main effect functions.

Table 9: Results of average means (std) of empirical value functions and misclassification rates for two simulation scenarios with 20 covariates. The best value functions and misclassification rates are in bold.

|            | $n = 400$         |                   | $n = 800$         |                   |
|------------|-------------------|-------------------|-------------------|-------------------|
|            | Value             | Misclassification | Value             | Misclassification |
| Scenario 1 |                   |                   |                   |                   |
| $l_1$ -PLS | 1.64(0.41)        | 0.52(0.29)        | 1.7(0.38)         | 0.47(0.27)        |
| Group-AD   | <b>1.97(0.06)</b> | <b>0.35(0.07)</b> | <b>2.05(0.04)</b> | <b>0.26(0.05)</b> |

### 1.6 Comparison between Group $l_1$ -PLS and $l_1$ -PLS

In this section, we compare the performance of group  $l_1$ -PLS and  $l_1$ -PLS using the first simulation scenario of the continuous outcome study. Table 10 demonstrates the performance of  $l_1$ -PLS in our simulation scenarios is similar to group  $l_1$ -PLS.

Table 10: Results of average means (std) of empirical value functions and misclassification rates for one continuous-outcome simulation scenarios with 20 covariates. The best value functions and misclassification rates are in bold.

|                  | $n = 400$          |                   | $n = 800$          |                    |
|------------------|--------------------|-------------------|--------------------|--------------------|
|                  | Value              | Misclassification | Value              | Misclassification  |
| Scenario 1       |                    |                   |                    |                    |
| Group $l_1$ -PLS | 3.12(0.07)         | 0.21(0.05)        | 3.16(0.04)         | 0.14(0.03)         |
| $l_1$ -PLS       | <b>3.12</b> (0.06) | <b>0.2</b> (0.05) | <b>3.17</b> (0.04) | <b>0.14</b> (0.03) |

## References

M. Qian and S. A. Murphy. Performance guarantees for individualized treatment rules. *Annals of Statistics*, 39(2):1180, 2011.
